# Supplementary material for: A PMAxxTM qPCR Assay Reveals That Dietary Administration of the Microalgae Tetraselmis chuii Does Not Affect Salmonella Infantis Caecal Content in Early-Treated Broiler Chickens
Source: MDPI journal article supplement (doi:10.3390/vetsci9090487), 2022-09-08
Supplement: s1 [file s1]

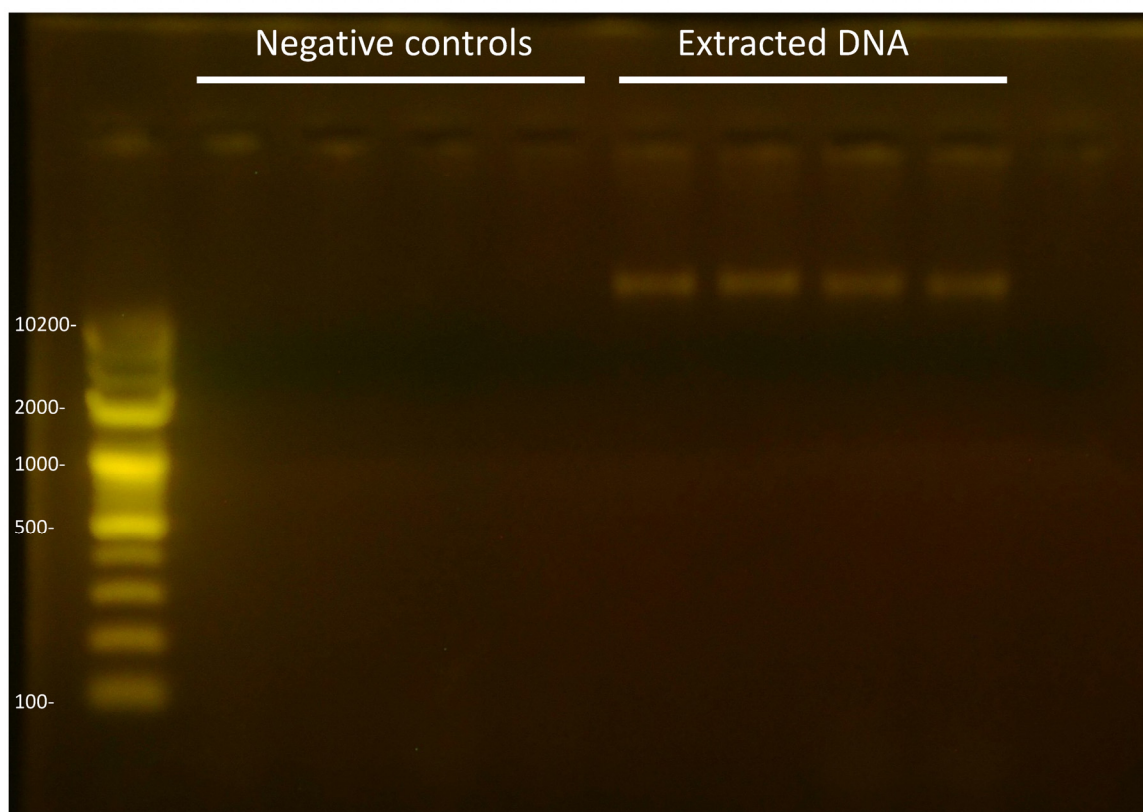

**Figure S1.** DNA integrity observation by electrophoresis in agarose gel. DNA samples were analyzed on a 0.8% agarose gel. The 100 bp Plus DNA Ladder (MW) was also separated as size reference.
