# Supplementary material for: A PMAxxTM qPCR Assay Reveals That Dietary Administration of the Microalgae Tetraselmis chuii Does Not Affect Salmonella Infantis Caecal Content in Early-Treated Broiler Chickens
Source: MDPI journal article supplement (doi:10.3390/vetsci9090487), 2022-09-08
Supplement: s1 [file s1]

| <b>Table S1.</b> Components of the qPCR reaction. |                                                                        |                            |
|---------------------------------------------------|------------------------------------------------------------------------|----------------------------|
| <b>Reaction components</b>                        | <b>Amount per 20 <math>\mu</math>L of reaction (<math>\mu</math>L)</b> | <b>Final concentration</b> |
| 2X Forget-Me-Not Master Mix                       | 10                                                                     | 1X                         |
| <i>invA</i> primer mix                            | 2                                                                      | 0.5 $\mu$ m                |
| DNA template                                      | 5                                                                      | X                          |
| High ROX marker                                   | 0.5 $\mu$ L (optional)                                                 | –                          |
| dH <sub>2</sub> O                                 | 3                                                                      | –                          |

| <b>Table S2.</b> COBB 500 Feed components and proximate composition of starter (0–8 days) diets                                                                                                                                                                                                                                                                                                                                                  |         |                    |
|--------------------------------------------------------------------------------------------------------------------------------------------------------------------------------------------------------------------------------------------------------------------------------------------------------------------------------------------------------------------------------------------------------------------------------------------------|---------|--------------------|
| <b>Ingredients (%)</b>                                                                                                                                                                                                                                                                                                                                                                                                                           | Control | Experimental group |
| Ground corn                                                                                                                                                                                                                                                                                                                                                                                                                                      | 52.99   | 52.88              |
| Soybean meal                                                                                                                                                                                                                                                                                                                                                                                                                                     | 36.3    | 36.23              |
| Calcium carbonate                                                                                                                                                                                                                                                                                                                                                                                                                                | 1.52    | 1.52               |
| Monocalcium phosphate                                                                                                                                                                                                                                                                                                                                                                                                                            | 1.07    | 1.07               |
| Sodium chloride                                                                                                                                                                                                                                                                                                                                                                                                                                  | 0.31    | 0.31               |
| Crude (vegetal) Fat                                                                                                                                                                                                                                                                                                                                                                                                                              | 7.4     | 7.39               |
| Antimycotic                                                                                                                                                                                                                                                                                                                                                                                                                                      | 0.10    | 0.10               |
| Mycotoxin Sequestrant                                                                                                                                                                                                                                                                                                                                                                                                                            | 0.05    | 0.05               |
| Antioxidant                                                                                                                                                                                                                                                                                                                                                                                                                                      | 0.02    | 0.02               |
| Phytase                                                                                                                                                                                                                                                                                                                                                                                                                                          | 0.01    | 0.01               |
| <sup>1</sup> Vitamin and mineral premix                                                                                                                                                                                                                                                                                                                                                                                                          | 0.23    | 0.23               |
| Microalgae-derived protein                                                                                                                                                                                                                                                                                                                                                                                                                       | -       | 0.08               |
| Microalgae-derived fat                                                                                                                                                                                                                                                                                                                                                                                                                           | -       | 0.01               |
| Microalgae-derived crude ash                                                                                                                                                                                                                                                                                                                                                                                                                     | -       | 0.05               |
| Microalgae-derived carbohydrate, fiber, rest of biomass                                                                                                                                                                                                                                                                                                                                                                                          | -       | 0.06               |
| <b>Nutrient specifications</b>                                                                                                                                                                                                                                                                                                                                                                                                                   |         |                    |
| <sup>2</sup> ME Kcal/kg diet                                                                                                                                                                                                                                                                                                                                                                                                                     | 2975    | 3025               |
| Digestible Lysine (%)                                                                                                                                                                                                                                                                                                                                                                                                                            | 1.22    | 1.12               |
| Digestible Methionine + Cysteine (%)                                                                                                                                                                                                                                                                                                                                                                                                             | 0.91    | 0.85               |
| Digestible Methionine (%)                                                                                                                                                                                                                                                                                                                                                                                                                        | 0.46    | 0.45               |
| Digestible Threonine (%)                                                                                                                                                                                                                                                                                                                                                                                                                         | 0.83    | 0.73               |
| Digestible Valine (%)                                                                                                                                                                                                                                                                                                                                                                                                                            | 0.89    | 0.85               |
| Digestible Isoleucine (%)                                                                                                                                                                                                                                                                                                                                                                                                                        | 0.77    | 0.72               |
| Digestible Arginine (%)                                                                                                                                                                                                                                                                                                                                                                                                                          | 1.28    | 1.18               |
| Digestible Tryptophan (%)                                                                                                                                                                                                                                                                                                                                                                                                                        | 0.20    | 0.18               |
| Crude protein (%)                                                                                                                                                                                                                                                                                                                                                                                                                                | 21.50   | 20.00              |
| Ca (%)                                                                                                                                                                                                                                                                                                                                                                                                                                           | 0.90    | 0.84               |
| Available P (%)                                                                                                                                                                                                                                                                                                                                                                                                                                  | 0.45    | 0.42               |
| Na (%)                                                                                                                                                                                                                                                                                                                                                                                                                                           | 0.23    | 0.16               |
| Cl (%)                                                                                                                                                                                                                                                                                                                                                                                                                                           | 0.22    | 0.19               |
| K (%)                                                                                                                                                                                                                                                                                                                                                                                                                                            | 0.95    | 0.72               |
| Choline (mg/kg)                                                                                                                                                                                                                                                                                                                                                                                                                                  | 500     | 400                |
| Linoleic acid (%)                                                                                                                                                                                                                                                                                                                                                                                                                                | 1.00    | 1.00               |
| <sup>1</sup> Vitamin premix incorporated in each kg of basal diets: Vitamin A 10,000 IU; vitamin D3 5000 IU; vitamin E 80 IU; vitamin K 3 mg; vitamin B1 3 mg; vitamin B2 9 mg; vitamin B6 4 mg; vitamin B12 0.02 mg; Biotin 0.15 mg; Pantothenic acid 15 mg; Folic acid 2 mg. Mineral premix incorporated in each kg of basal diets: Mn, 100 mg; Zn, 100 mg; Fe, 40 mg; Cu, 15 mg; I, 1 mg, Se, 0.35 mg. <sup>2</sup> ME, metabolizable energy. |         |                    |
